# Supplementary material for: Fluorescence properties of dissolved organic matter as a function of hydrophobicity and molecular weight: case studies from two membrane bioreactors and an oxidation ditch
Source: Royal Society of Chemistry journal article supplement (doi:10.1039/c5ra23167a), 2016-01-01
Supplement: c5ra23167a1.pdf [file c5ra23167a1.pdf]

## Supplementary Information

### **Fluorescent properties of dissolved organic matter as a function of hydrophobicity and molecular weight? Case studies from two membrane bioreactors and an oxidation ditch**

Kang Xiao<sup>a,b</sup>, Jian-yu Sun<sup>b</sup>, Yue-xiao Shen<sup>b</sup>, Shuai Liang<sup>b</sup>, Peng Liang<sup>b</sup>,

Xiao-mao Wang<sup>b,\*</sup>, Xia Huang<sup>b,\*\*</sup>

<sup>a</sup> College of Resources and Environment, University of Chinese Academy of Sciences,  
Beijing 100049, China

<sup>b</sup> State Key Joint Laboratory of Environment Simulation and Pollution Control,  
School of Environment, Tsinghua University, Beijing 100084, China

RSC Advances

---

\* Corresponding author. Tel.: 86-10-62781386.

\*\* Corresponding author. Tel.: 86-10-62772324.

*E-mail address:* wangxiaomao@tsinghua.edu.cn (X. Wang), xhuang@tsinghua.edu.cn

(X. Huang).

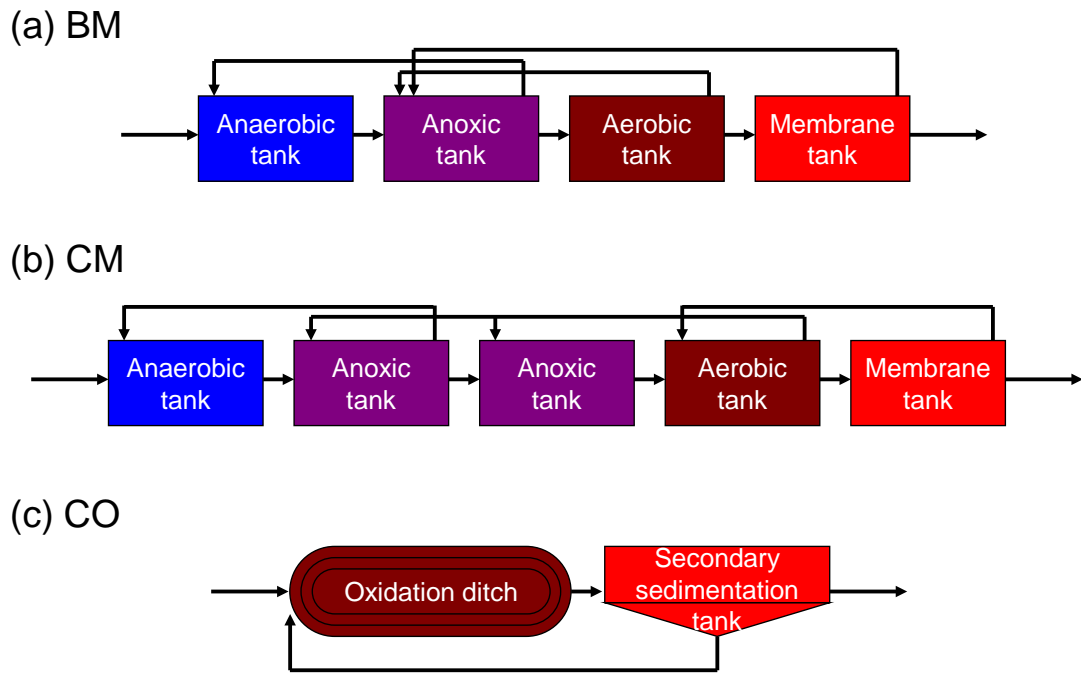

**Fig. S1.** Process flow of the three wastewater treatment plants for case studies. BM and CM are based on membrane bioreactor, while CO based on oxidation ditch.

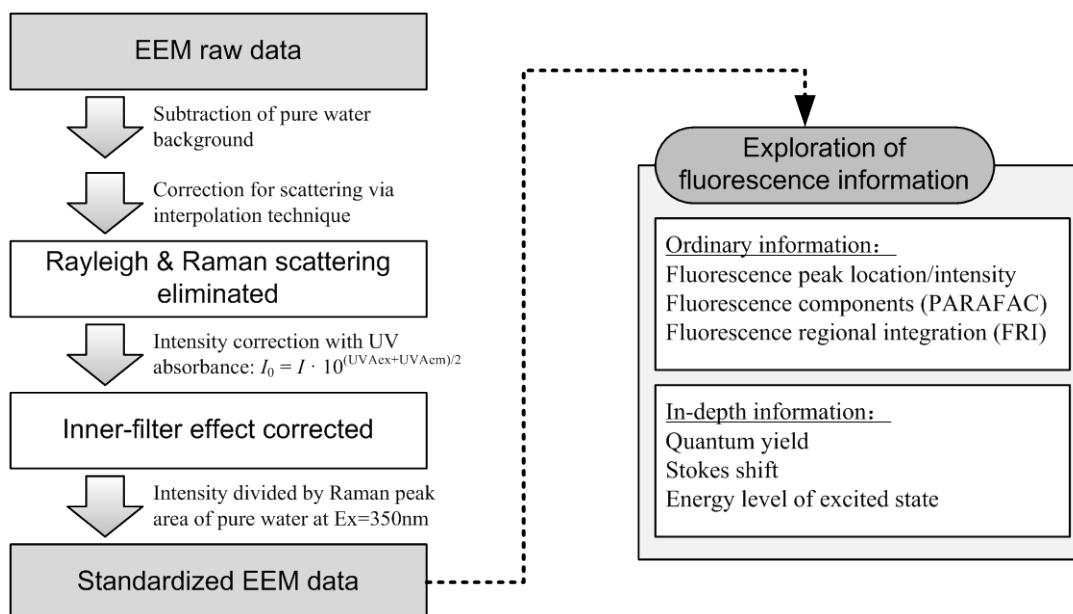

**Fig. S2.** Protocol for EEM data processing and fluorescence information exploration.

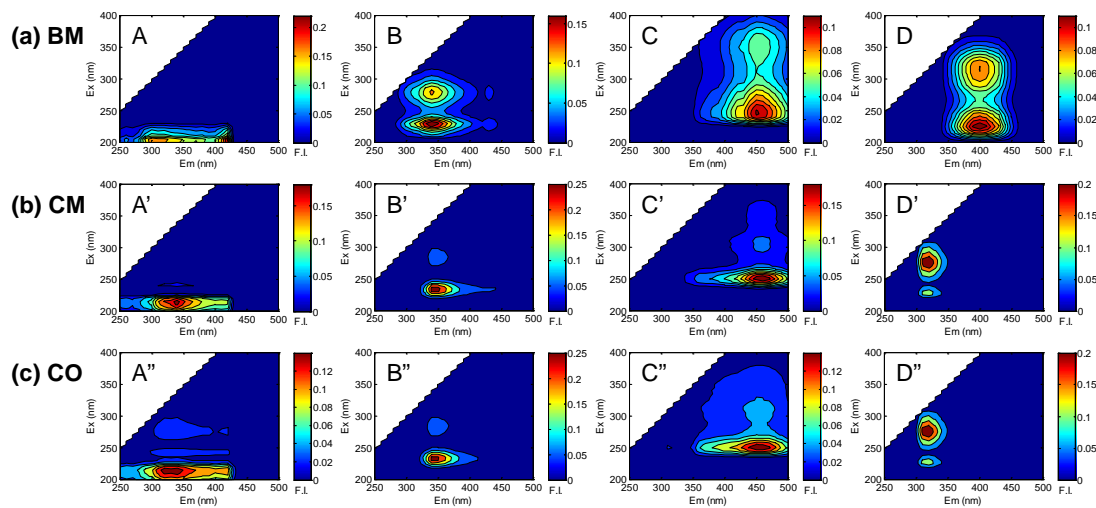

**Fig. S3.** Fluorescence components of DOM from the three wastewater treatment plants, based on PARAFAC analysis.

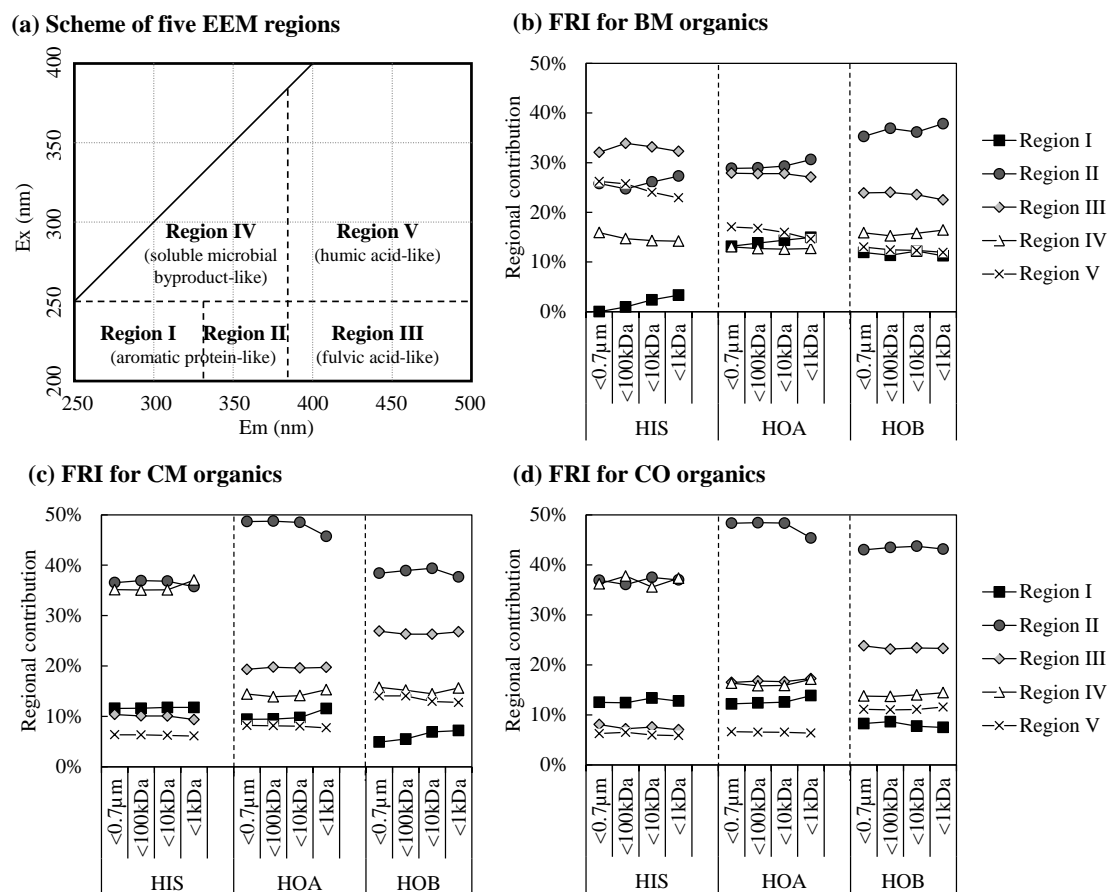

**Fig. S4.** Fluorescence regional integration based on EEM spectra of DOM fractions from the BM, CM, and CO plants.

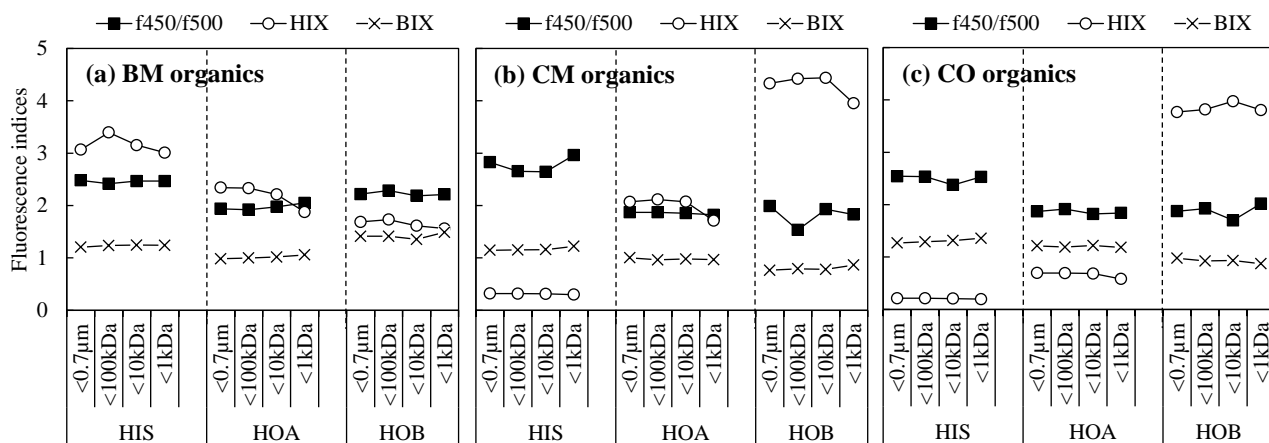

**Fig. S5.** Fluorescence indices ( $f_{450}/f_{500}$ , HIX, and BIX) of DOM fractions from the BM, CM, and CO plants.

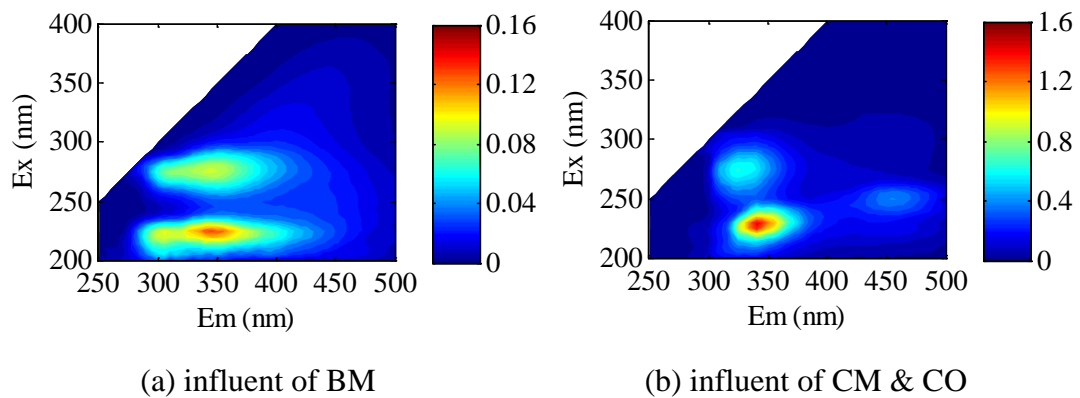

**Fig. S6.** EEM spectra of the influent wastewaters of the three wastewater treatment plants. The color bars are scaled by Raman Unit per mgTOC/L.

**Table S1** PARAFAC fluorescent components of DOM from the three wastewater treatment plants.

| DOM source | Fluorescent component <sup>a</sup> | Peak location (nm) <sup>b</sup><br>(Ex/Em) | Contribution rate to overall fluorescence (%) |     |     | Possible chemical composition <sup>b</sup>      |
|------------|------------------------------------|--------------------------------------------|-----------------------------------------------|-----|-----|-------------------------------------------------|
|            |                                    |                                            | HIS                                           | HOA | HOB |                                                 |
| BM         | A                                  | <b>(205/300)</b>                           | 0                                             | 4   | 5   | <b>Aromatic proteins</b>                        |
|            | B                                  | <b>(230/340)</b> , (280/340)               | 12                                            | 18  | 25  | <b>Aromatic proteins</b> , microbial byproducts |
|            | C                                  | <b>(245/450)</b> , (350/450)               | 46                                            | 48  | 40  | <b>Fulvic acids</b> , humic acids               |
|            | D                                  | <b>(225/400)</b> , (315/410)               | 42                                            | 30  | 30  | <b>Fulvic acids</b> , humic acids               |
| CM         | A'                                 | <b>(215/340)</b>                           | 1                                             | 14  | 8   | <b>Aromatic proteins</b>                        |
|            | B'                                 | <b>(235/350)</b> , (285/350)               | 27                                            | 48  | 34  | <b>Aromatic proteins</b> , microbial byproducts |
|            | C'                                 | <b>(250/460)</b> , (310/460)               | 9                                             | 20  | 39  | <b>Humic/fulvic acids</b> , humic acids         |
|            | D'                                 | (230/320), <b>(275/320)</b>                | 63                                            | 47  | 18  | Aromatic proteins, <b>microbial byproducts</b>  |
| CO         | A''                                | <b>(215/340)</b>                           | 1                                             | 16  | 10  | <b>Aromatic proteins</b>                        |
|            | B''                                | <b>(235/340)</b> , (285/340)               | 27                                            | 51  | 47  | <b>Aromatic proteins</b> , microbial byproducts |
|            | C''                                | <b>(250/450)</b> , (310/450)               | 6                                             | 10  | 27  | <b>Humic/fulvic acids</b> , humic acids         |
|            | D''                                | (225/320), <b>(275/320)</b>                | 66                                            | 23  | 16  | Aromatic proteins, <b>microbial byproducts</b>  |

<sup>a</sup> The labeled fluorescent components correspond to those in **Fig. S3**.

<sup>b</sup> The primary peak and the corresponding chemical composition are shown in **bold**.



**Table S2** Fluorescence-intensity-weighted average excited energy state (calculated from Fig. 5 as average RMS of Ex and Em (nm)) of DOM fractions from the BM, CM, and CO plants.

| Molecular size | BM organics |       |       | CM organics |       |       | CO organics |       |       |
|----------------|-------------|-------|-------|-------------|-------|-------|-------------|-------|-------|
|                | HIS         | HOA   | HOB   | HIS         | HOA   | HOB   | HIS         | HOA   | HOB   |
| <0.7 $\mu$ m   | 362.2       | 336.2 | 328.8 | 312.7       | 322.4 | 342.0 | 312.1       | 314.5 | 332.1 |
| <100kDa        | 359.3       | 334.9 | 328.4 | 312.6       | 322.5 | 342.0 | 312.2       | 314.3 | 331.2 |
| <10kDa         | 355.3       | 332.7 | 327.7 | 312.3       | 321.7 | 338.1 | 311.2       | 313.9 | 332.3 |
| <1kDa          | 352.0       | 329.1 | 327.6 | 311.5       | 318.9 | 336.8 | 310.8       | 312.3 | 333.9 |
